# Supplementary material for: How many cyberbullying(s)? A non-unitary perspective for offensive online behaviours
Source: PubMed Central journal article supplement (PMC9295961; doi:10.1371/journal.pone.0268838), 2022-07-19

## Supporting information 3: Plots of the effects of the significant predictors in the ordinal logistic regression models.

In the following pages are presented the effects plots for all the significant predictors in the ordinal regression models. Each plot represents the estimated probability of the different responses concerning the frequency of perpetration of a given type of cyberbullying behaviour, as a function of one of the significant predictors. The probabilities were estimated from the fitted regression models presented in the paper. All the code for reproducing the plots is provided as S2 File.

## Effects of significant predictors of sending mean messages (Cyb 1)

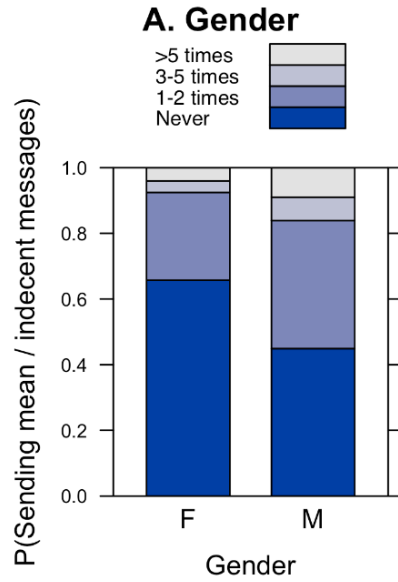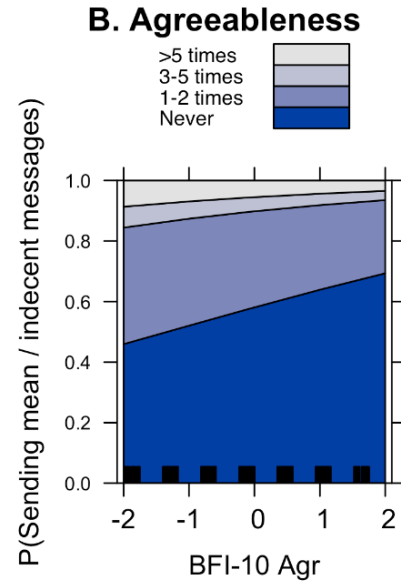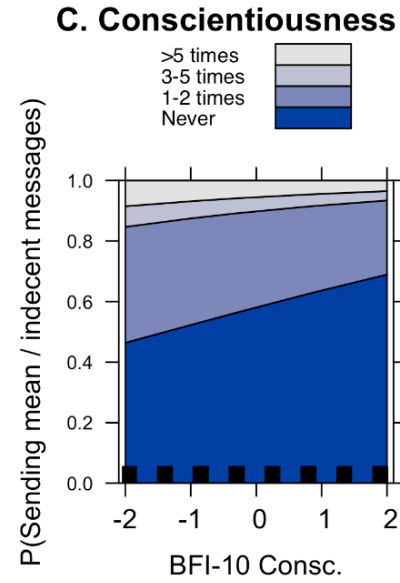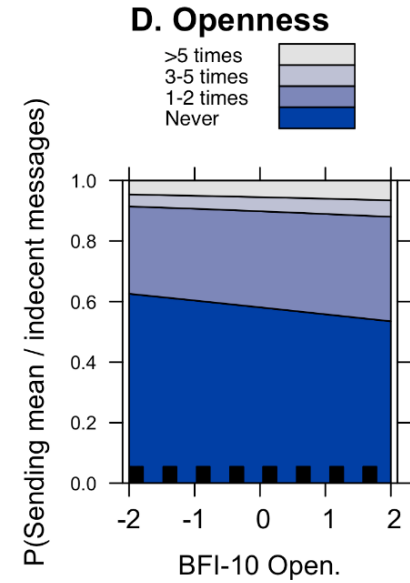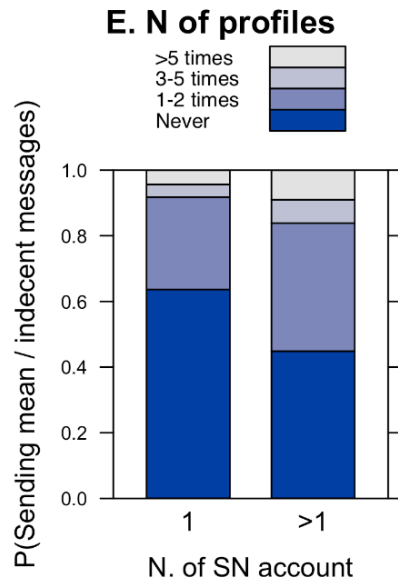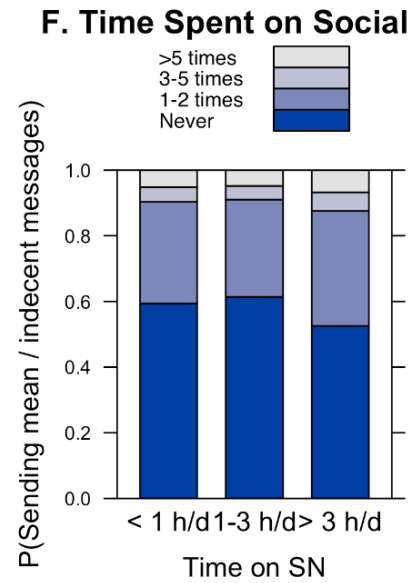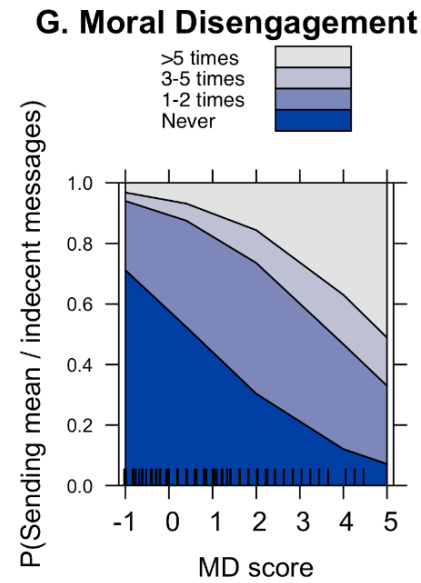

### Effects of Moral Disengagement on sending mean emails (Cyb 2)

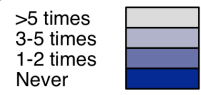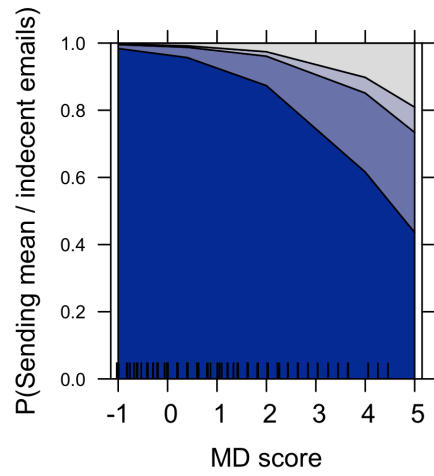

## Effects of significant predictors of sending embarrassing photos (Cyb 3)

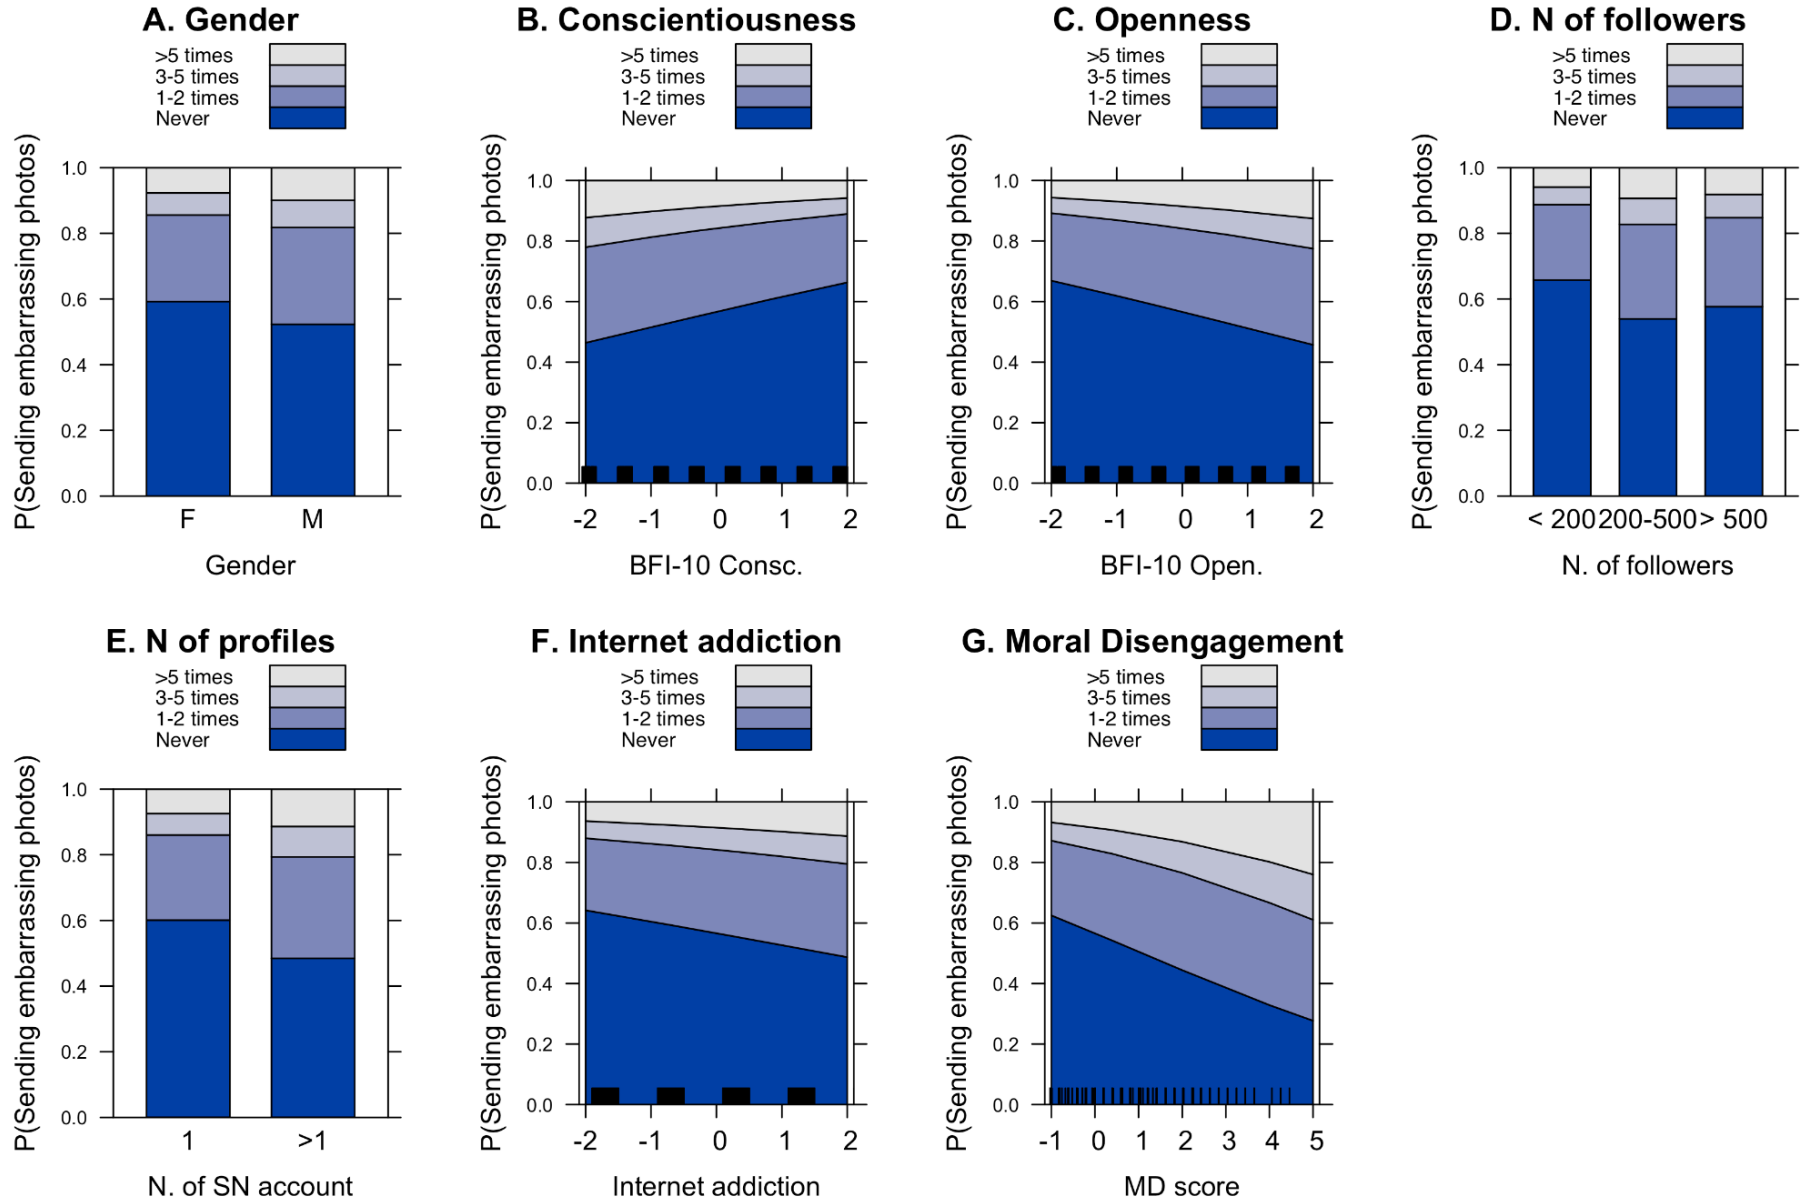

## Effects of significant predictors of pretending to be someone else online (Cyb 4)

**A. Conscientiousness**

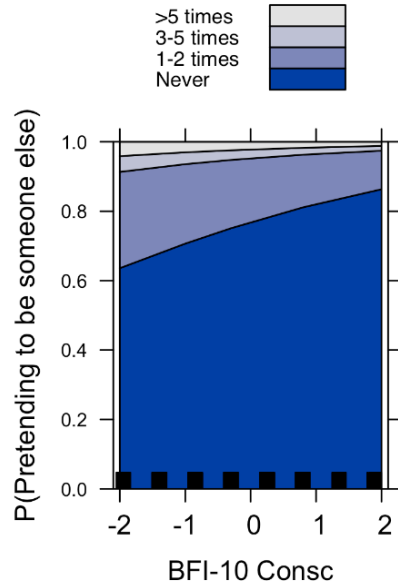

**B. N of profiles**

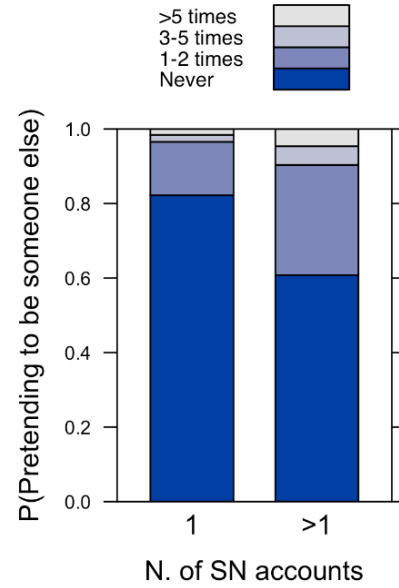

**C. Internet addiction**

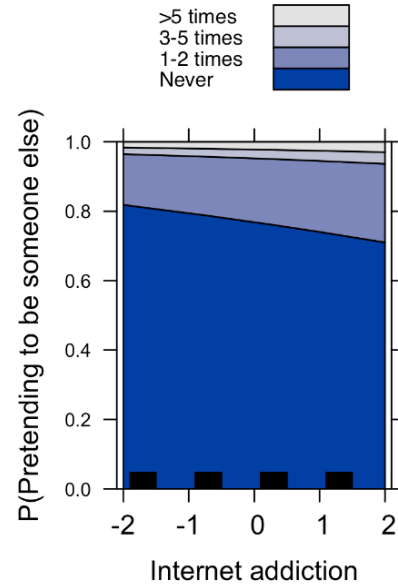

**D. Moral Disengagement**

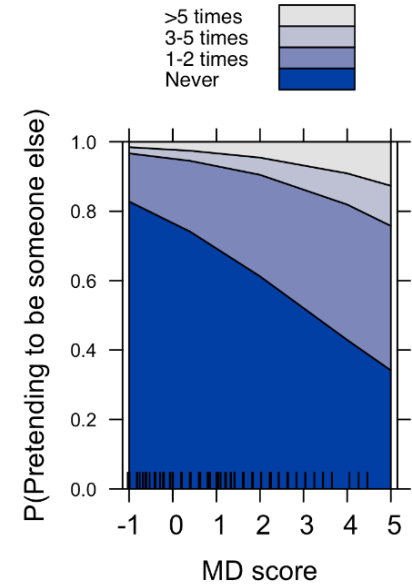

## Effects of significant predictors of revealing secrets (Cyb 5)

### A. Conscientiousness

>5 times  
3-5 times  
1-2 times  
Never

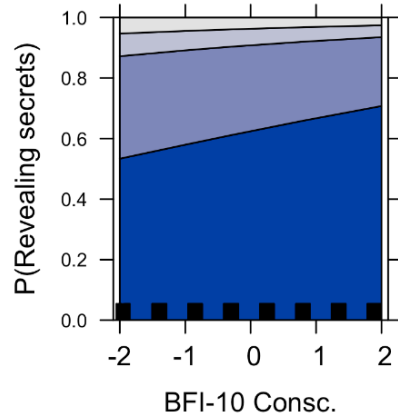

### B. Openness

>5 times  
3-5 times  
1-2 times  
Never

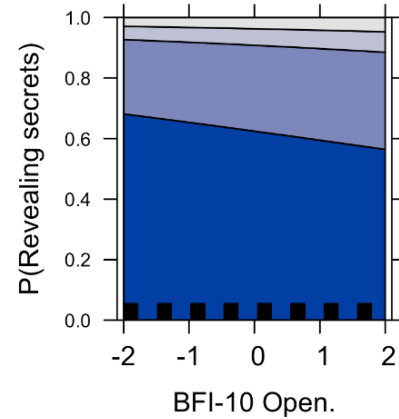

### C. N of followers

>5 times  
3-5 times  
1-2 times  
Never

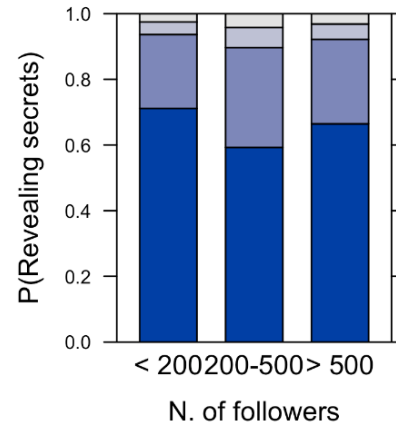

### D. Time Spent on Social

>5 times  
3-5 times  
1-2 times  
Never

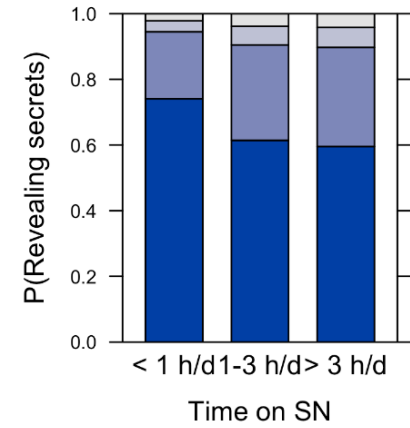

### E. N of profiles

>5 times  
3-5 times  
1-2 times  
Never

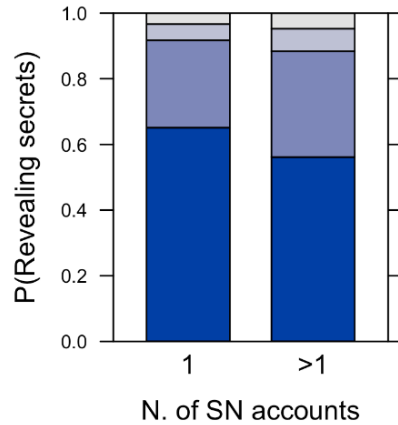

### F. Internet addiction

>5 times  
3-5 times  
1-2 times  
Never

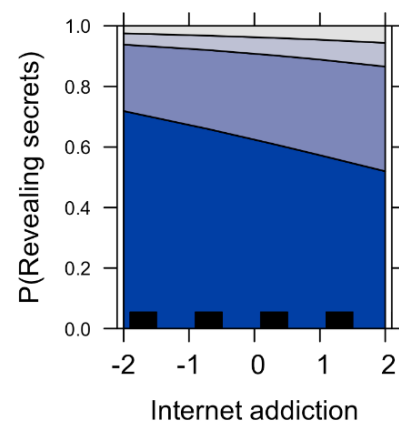

### G. Moral Disengagement

>5 times  
3-5 times  
1-2 times  
Never

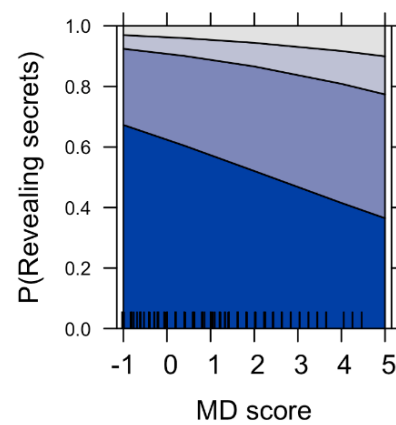

## Effects of significant predictors of spreading rumors/gossip online (Cyb 6)

**A. Agreeableness**

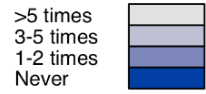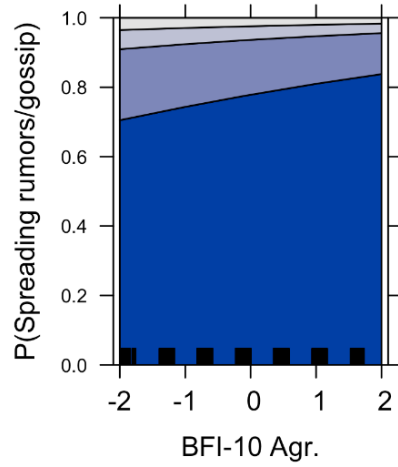

**B. Extraversion**

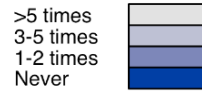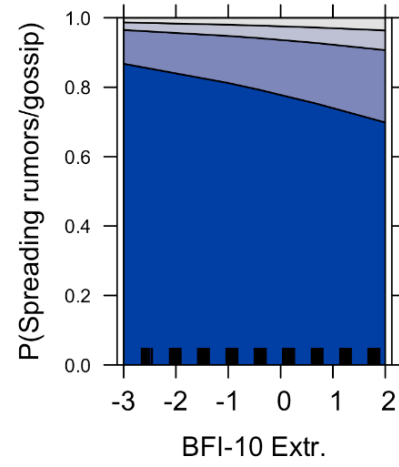

**C. N of profiles**

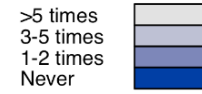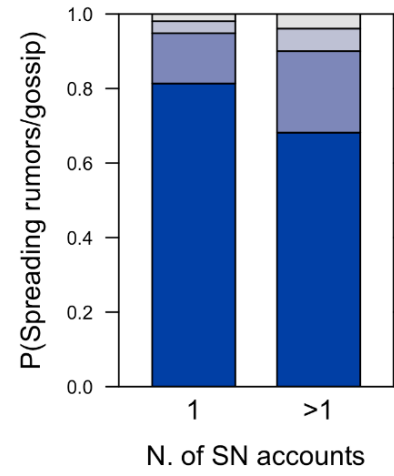

**D. Moral Disengagement**

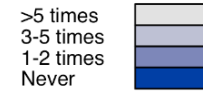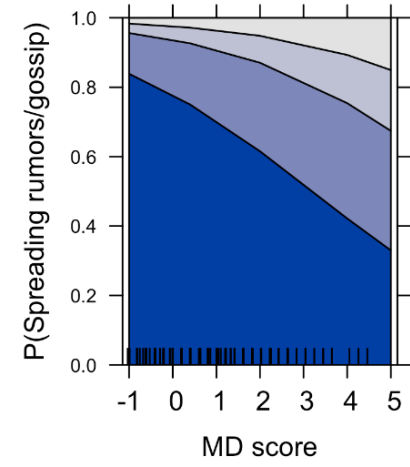

Supplement: pone.0268838.s008.pdf [file pone.0268838.s008.pdf]
