# Supplementary material for: How many cyberbullying(s)? A non-unitary perspective for offensive online behaviours
Source: PLoS One. 2022 Jul 19;17(7):e0268838. doi: 10.1371/journal.pone.0268838 (PMC9295961; doi:10.1371/journal.pone.0268838)
Supplement: S1 Text — Full text of questionnaire used in the study. (PDF) [file pone.0268838.s001.pdf]

## Supporting information 1: Full text of questionnaire used in the study

## Sezione anagrafica

Età: \_\_\_\_\_

Genere: M / F

Tipo di scuola che frequenti:

- ☐ Liceo Classico
- ☐ Istituto Tecnico
- ☐ Liceo Scientifico
- ☐ Istituto Professionale
- ☐ Liceo Artistico
- ☐ Liceo della Formazione
- ☐ Liceo Linguistico

## Sezione uso social media

Quali dei seguenti social usi principalmente?

- ☐ Tumblr
- ☐ Google+
- ☐ yahoo!
- ☐ Answer
- ☐ Youtube
- ☐ ask.fm
- ☐ Instagram
- ☐ Facebook
- ☐ Snapchat
- ☐ Whatsapp
- ☐ Twitter Pinterest

Quanto ti senti nervoso se non puoi usare Internet?

(Per niente) 0 - 1 - 2 - 3 - 4 (Molto)

Quanto tempo mediamente trascorri sul social che utilizzi di più?

- ☐ < 1 ora/giorno
- ☐ 1-3 ore al giorno
- ☐ > 3 ore al giorno

Sui social hai

- ☐ Nessun profilo
- ☐ Un solo profilo
- ☐ Più di un profilo

In TUTTO hai \_\_\_\_\_ follower

## Sezione personalità

Mi vedo come una persona che

È riservata

(Per niente d'accordo) 1 - 2 - 3 - 4 - 5 (Del tutto d'accordo)

Generalmente si fida

(Per niente d'accordo) 1 - 2 - 3 - 4 - 5 (Del tutto d'accordo)

Tende a essere pigra

(Per niente d'accordo) 1 - 2 - 3 - 4 - 5 (Del tutto d'accordo)

È rilassata, sopporta bene lo stress

(Per niente d'accordo) 1 - 2 - 3 - 4 - 5 (Del tutto d'accordo)

Ha pochi interessi artistici

(Per niente d'accordo) 1 - 2 - 3 - 4 - 5 (Del tutto d'accordo)

È spigliata, socievole

(Per niente d'accordo) 1 - 2 - 3 - 4 - 5 (Del tutto d'accordo)

Tende a trovare i difetti negli altri

(Per niente d'accordo) 1 - 2 - 3 - 4 - 5 (Del tutto d'accordo)

È coscienziosa nel lavoro

(Per niente d'accordo) 1 - 2 - 3 - 4 - 5 (Del tutto d'accordo)

Si agita facilmente

(Per niente d'accordo) 1 - 2 - 3 - 4 - 5 (Del tutto d'accordo)

Ha una fervida immaginazione

(Per niente d'accordo) 1 - 2 - 3 - 4 - 5 (Del tutto d'accordo)

## Sezione disimpegno morale

Cyberbullizzare compagni di classe fastidiosi è soltanto dare loro una lezione

(Per niente d'accordo) 1 - 2 - 3 - 4 - 5 (Del tutto d'accordo)

Ai ragazzi non importa davvero di essere cyberbullizzati perché questo mostra che gli altri sono interessati

(Per niente d'accordo) 1 - 2 - 3 - 4 - 5 (Del tutto d'accordo)

Va bene trattare male qualcuno se si comporta da stupido

(Per niente d'accordo) 1 - 2 - 3 - 4 - 5 (Del tutto d'accordo)

Se le persone danno le loro password ad altri, meritano di essere cyberbullizzati  
(Per niente d'accordo) 1 - 2 - 3 - 4 - 5 (Del tutto d'accordo)

Va bene vendicarsi se qualcuno fa il prepotente con uno dei tuoi amici  
(Per niente d'accordo) 1 - 2 - 3 - 4 - 5 (Del tutto d'accordo)

Va bene diffondere cattivi pettegolezzi su qualcuno perché non è così grave come picchiarlo  
(Per niente d'accordo) 1 - 2 - 3 - 4 - 5 (Del tutto d'accordo)

I ragazzi che cyberbullizzano gli altri ragazzi perché i loro amici li spingono a farlo non dovrebbero essere colpevolizzati per quello che fanno  
(Per niente d'accordo) 1 - 2 - 3 - 4 - 5 (Del tutto d'accordo)

Se i ragazzi cyberbullizzano gli altri a scuola, è colpa dell'insegnante per non averli fermati  
(Per niente d'accordo) 1 - 2 - 3 - 4 - 5 (Del tutto d'accordo)

## Sezione cyberbullismo

Quante volte hai inviato messaggi cattivi o indecenti?

- ☐ Mai
- ☐ 1-2 volte
- ☐ 3-5 volte
- ☐ Più di 5 volte

Quanto spesso hai inviato email cattive o indecenti?

- ☐ Mai
- ☐ 1-2 volte
- ☐ 3-5 volte
- ☐ Più di 5 volte

Quanto spesso hai inviato foto imbarazzanti di qualcuno via cellulare?

- ☐ Mai
- ☐ 1-2 volte
- ☐ 3-5 volte
- ☐ Più di 5 volte

Quanto spesso hai finto di essere qualcun'altro su Internet?

- ☐ Mai
- ☐ 1-2 volte
- ☐ 3-5 volte
- ☐ Più di 5 volte

Quante volte ti è capitato di dire i segreti di qualcun'altro online o attraverso il cellulare senza permesso?

- ☐ Mai

- 1-2 volte
- 3-5 volte
- Più di 5 volte

Quanto spesso hai diffuso pettegolezzi riguardo qualcuno su Internet?

- Mai
- 1-2 volte
- 3-5 volte
- Più di 5 volte
